# Supplementary material
Source: PubMed Central journal article supplement (PMC7032664)

Figure 1. Correlations between changes in subjective cognitive difficulties with changes in cognitive performance and symptom severity.

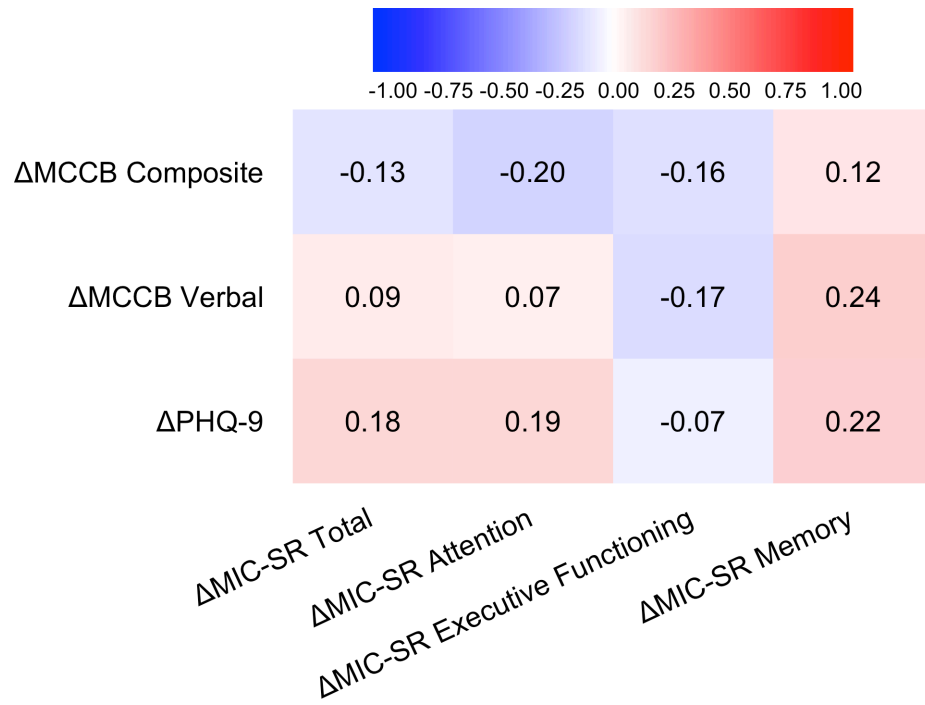

Figure 2. Correlations between subjective cognitive difficulties, cognitive performance, and symptom severity.

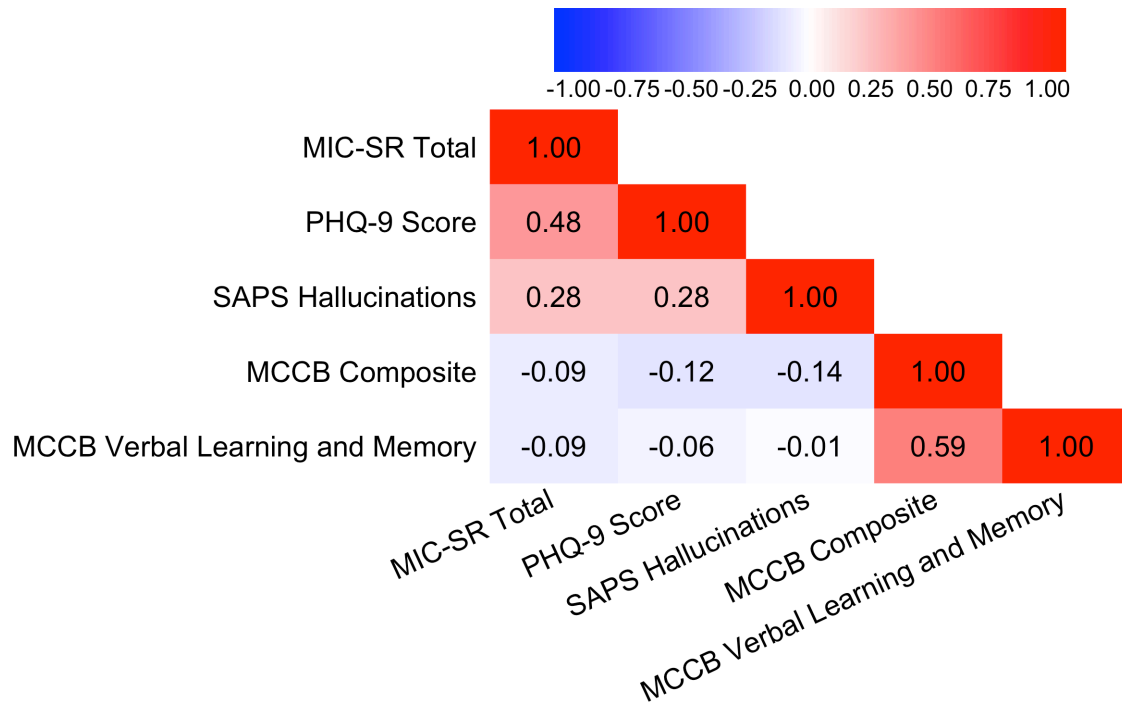

Supplement: NIHMS1518946-supplement-2.pdf [file NIHMS1518946-supplement-2.pdf]
