# Supplementary material
Source: PubMed Central journal article supplement (PMC7032664)

# CONSORT DIAGRAM

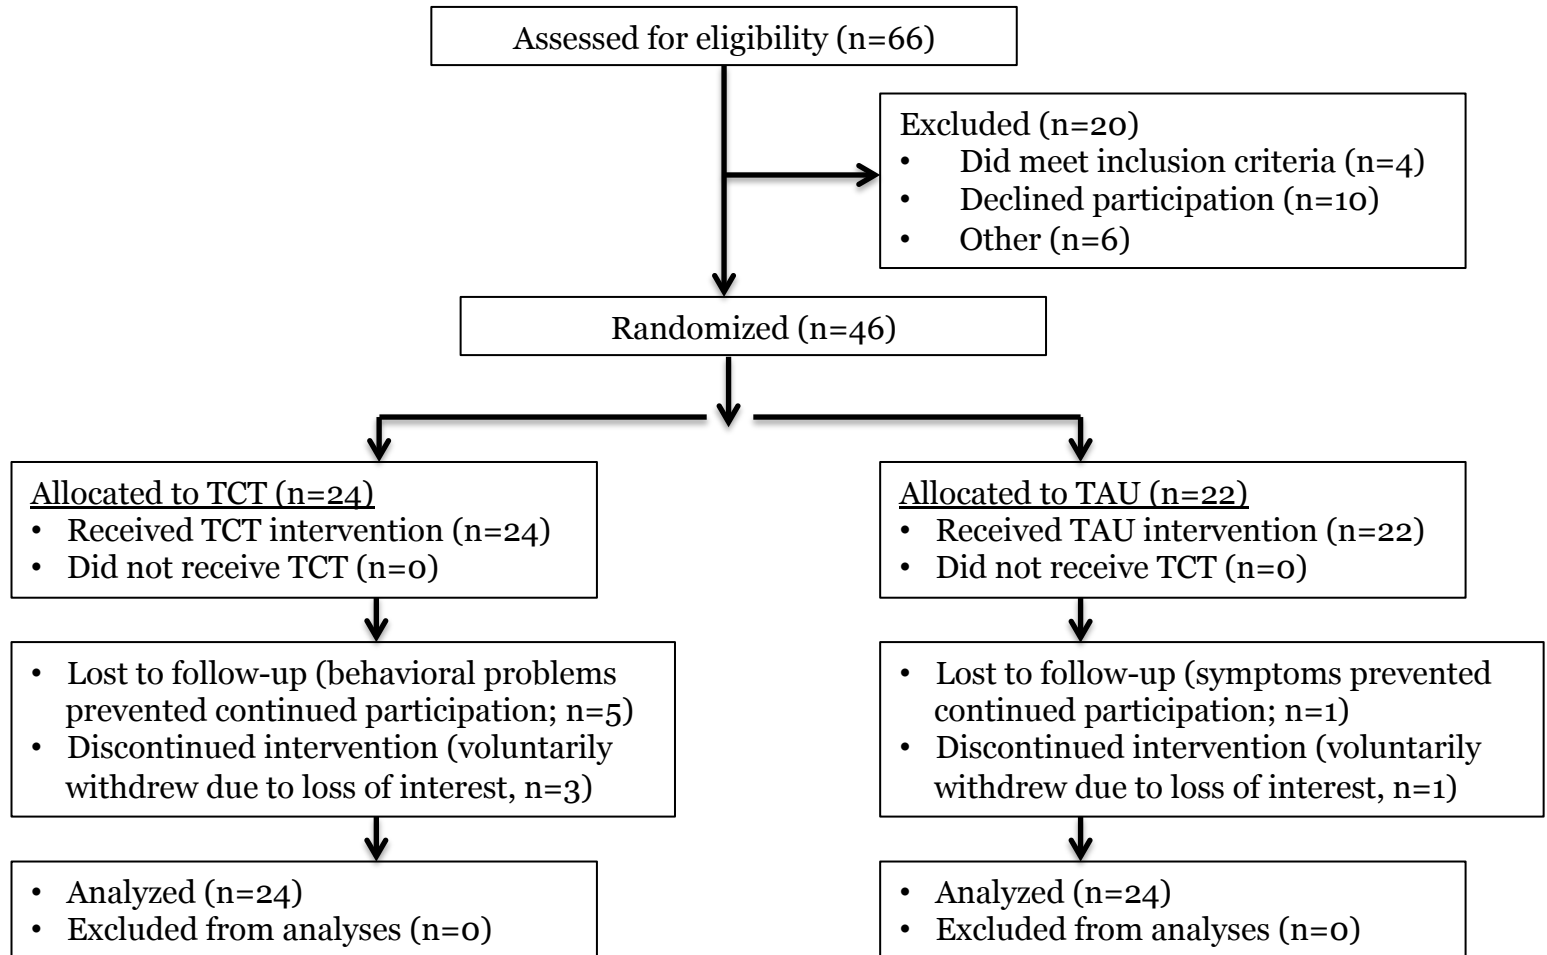

Supplement: NIHMS1518946-supplement-1.pdf [file NIHMS1518946-supplement-1.pdf]
